# Supplementary material for: Handoffs and transitions in critical care (HATRICC): protocol for a mixed methods study of operating room to intensive care unit handoffs
Source: PubMed Central journal article supplement (PMC4255652; doi:10.1186/1471-2482-14-96), 2014-11-19
Supplement: 12893_2014_535_MOESM1_ESM.pdf [file 12893_2014_535_MOESM1_ESM.pdf]

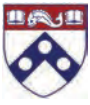

# ICU Handoff Assessment Tool

Date: \_\_\_\_\_  
Time start: \_\_\_\_\_  
Observer: \_\_\_\_\_  
Room: \_\_\_\_\_

|                             |                 |
|-----------------------------|-----------------|
| <b>PATIENT STICKER HERE</b> |                 |
| <b>NAME:</b>                |                 |
| <b>MRN:</b>                 |                 |
| <b>DOB:</b>                 | <b>SEX: F M</b> |

**Stability:** Stable Unstable RRT/Code  
**Admission type:** Planned/elective Unplanned/Urgent  
**New ICU admission?** New ICU re-admit  
**Origin:** OR ED ward other ICU OSH Other: \_\_\_\_\_  
**Receiving:** HUP Rh5 PPMC M2 Other: \_\_\_\_\_  
**Number of people in room:** \_\_\_\_\_

### HANDOFF CONTENT

|                                  |                            |                            |                              |           |
|----------------------------------|----------------------------|----------------------------|------------------------------|-----------|
| Hands-on exam by receiving team? | Y <input type="checkbox"/> | N <input type="checkbox"/> | Unk <input type="checkbox"/> | Exam      |
| Past medical history             | Y <input type="checkbox"/> | N <input type="checkbox"/> | Unk <input type="checkbox"/> | PHist     |
| Reason for ICU admission         | Y <input type="checkbox"/> | N <input type="checkbox"/> | Unk <input type="checkbox"/> | HPI       |
| Allergies                        | Y <input type="checkbox"/> | N <input type="checkbox"/> | Unk <input type="checkbox"/> | Allergies |
| Airway                           | Y <input type="checkbox"/> | N <input type="checkbox"/> | Unk <input type="checkbox"/> | Airway    |
| Breathing/ventilation            | Y <input type="checkbox"/> | N <input type="checkbox"/> | Unk <input type="checkbox"/> | Breathing |
| Circulation/hemodynamics         | Y <input type="checkbox"/> | N <input type="checkbox"/> | Unk <input type="checkbox"/> | Circ      |
| Inputs                           | Y <input type="checkbox"/> | N <input type="checkbox"/> | Unk <input type="checkbox"/> | Ins       |
| Outputs                          | Y <input type="checkbox"/> | N <input type="checkbox"/> | Unk <input type="checkbox"/> | Outs      |
| Drains/lines                     | Y <input type="checkbox"/> | N <input type="checkbox"/> | Unk <input type="checkbox"/> | Lines     |
| Complications (or absence of)    | Y <input type="checkbox"/> | N <input type="checkbox"/> | Unk <input type="checkbox"/> | Comps     |
| Plan                             | Y <input type="checkbox"/> | N <input type="checkbox"/> | Unk <input type="checkbox"/> | Plan      |
| Family                           | Y <input type="checkbox"/> | N <input type="checkbox"/> | Unk <input type="checkbox"/> | Family    |
| Team contact info                | Y <input type="checkbox"/> | N <input type="checkbox"/> | Unk <input type="checkbox"/> | Contact   |

### PMH/SurgHx:

- HTN
- CAD / MI
- s/p CABG
- DM
- Renal failure

### Handoff types:

- Anes MD/CRNA to ICU MD/NP
- Anes MD/CRNA to ICU RN
- Anes MD/CRNA to resp tech
- Surg MD/PA to ICU MD/NP
- Surg MD/PA to ICU RN
- Origin RN to ICU RN
- \_\_\_\_\_ to whole room
- \_\_\_\_\_ to \_\_\_\_\_
- \_\_\_\_\_ to \_\_\_\_\_

### Allergies:

Y N  
List allergies: \_\_\_\_\_

### Vasoactives:

- Phenylephrine ("Neo")
- Norepi ("Levophed")
- Epinephrine ("Epi")
- Vasopressin ("Vaso")
- Nicardipine ("Cardene")
- Nitroglycerin ("Nitro")
- Other: \_\_\_\_\_

### Airway:

- "Difficult"
- Fiberoptic
- "Easy"

**Inputs:** \_\_\_\_\_

**Outputs:** \_\_\_\_\_

### COMMUNICATION QUALITY, SETTING

Trans Provider: \_\_\_\_\_ Rec Provider: \_\_\_\_\_  
Handoff Start: \_\_\_\_\_ Stop: \_\_\_\_\_  
Location: bedside hallway phone other: \_\_\_\_\_  
*If in-person handoff, complete remainder of box*

Quality of **Transmitting** Provider Delivery:  
Superior Satisfactory Unsatisfactory

Attributes of **Recipient** Listening:

|                      |                            |                            |
|----------------------|----------------------------|----------------------------|
| Eye contact          | Y <input type="checkbox"/> | N <input type="checkbox"/> |
| Affirm. statements   | Y <input type="checkbox"/> | N <input type="checkbox"/> |
| Head nodding         | Y <input type="checkbox"/> | N <input type="checkbox"/> |
| Note-taking          | Y <input type="checkbox"/> | N <input type="checkbox"/> |
| ?-asking/interactive | Y <input type="checkbox"/> | N <input type="checkbox"/> |

Noise: Quiet Neither quiet nor loud Loud  
Interruption Score (see reverse for grading): \_\_\_\_\_  
# unrelated to patient care (e.g. pages): \_\_\_\_\_  
# due to patient care: \_\_\_\_\_

Trans Provider: \_\_\_\_\_ Rec Provider: \_\_\_\_\_  
Handoff Start: \_\_\_\_\_ Stop: \_\_\_\_\_  
Location: bedside hallway phone other: \_\_\_\_\_  
*If in-person handoff, complete remainder of box*

Quality of **Transmitting** Provider Delivery:  
Superior Satisfactory Unsatisfactory

Attributes of **Recipient** Listening:

|                      |                            |                            |
|----------------------|----------------------------|----------------------------|
| Eye contact          | Y <input type="checkbox"/> | N <input type="checkbox"/> |
| Affirm. statements   | Y <input type="checkbox"/> | N <input type="checkbox"/> |
| Head nodding         | Y <input type="checkbox"/> | N <input type="checkbox"/> |
| Note-taking          | Y <input type="checkbox"/> | N <input type="checkbox"/> |
| ?-asking/interactive | Y <input type="checkbox"/> | N <input type="checkbox"/> |

Noise: Quiet Neither quiet nor loud Loud  
Interruption Score (see reverse for grading): \_\_\_\_\_  
# unrelated to patient care (e.g. pages): \_\_\_\_\_  
# due to patient care: \_\_\_\_\_

**Quality of Teamwork:** Superior Satisfactory Unsatisfactory **Quality of Professionalism:** Superior Satisfactory Unsatisfactory

Provider presence: Time all providers gone: \_\_\_\_\_ Time all nurses gone: \_\_\_\_\_ Time all clinical staff gone: \_\_\_\_\_

APACHE 2 Score: \_\_\_\_\_
