# Supplementary material for: Handoffs and transitions in critical care (HATRICC): protocol for a mixed methods study of operating room to intensive care unit handoffs
Source: BMC Surg. 2014 Nov 19;14:96. doi: 10.1186/1471-2482-14-96 (PMC4255652; doi:10.1186/1471-2482-14-96)
Supplement: Supplementary file 3 — Additional file 3: Pre-intervention survey. (PDF 487 KB) [file 12893_2014_535_MOESM3_ESM.pdf]

# OR to ICU handoff study

Please complete the survey below.

Thank you!

- 1) What kind of care provider are you?
  - ☐ Physician
  - ☐ Nurse (CNA, RN)
  - ☐ Advanced practitioner (CRNA, NP, PA)
  - ☐ Student
  - ☐ Other
- 2) What physician role do you have?
  - ☐ Attending physician
  - ☐ Fellow
  - ☐ Resident or intern
- 3) What nurse role do you have?
  - ☐ ICU nurse (RN)
  - ☐ OR nurse (RN)
  - ☐ CNA
  - ☐ Other type of nurse
- 4) What kind of advanced practitioner are you?
  - ☐ CRNA
  - ☐ NP
  - ☐ PA
- 5) You selected "Other" as your provider type. What kind of provider are you?
 

\_\_\_\_\_
- 6) In what clinical locations do you work? Choose all that apply.
  - ☐ HUP Rhoads 5 SICU
  - ☐ HUP OR
  - ☐ PPMC Myrin 2 SICU
  - ☐ PPMC OR
- 7) Do you think of yourself as someone who GIVES OR-to-ICU handoffs, someone who RECEIVES them, or both?
  - ☐ I am part of the OR team GIVING handoffs to the ICU team.
  - ☐ I am part of the ICU team RECEIVING handoffs from the OR team.
  - ☐ BOTH: I am sometimes part of the OR team and sometimes part of the ICU team.
- 8) List some words or short phrases that come to mind when you think about OR to ICU handoffs.
 

\_\_\_\_\_
- 9) Move the slider to indicate your current SATISFACTION with OR to ICU handoffs.
 

Very dissatisfied

Neither satisfied  
nor dissatisfied

Very satisfied

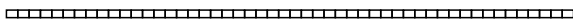

(Place a mark on the scale above)

---

## How often are the following statements true?

- |                                                                   | Never                    | Rarely                   | Sometimes                | Usually                  | Always                   |
|-------------------------------------------------------------------|--------------------------|--------------------------|--------------------------|--------------------------|--------------------------|
| 10) I feel comfortable handing off to other providers.            | <input type="checkbox"/> |
| 11) During handoff, I transmit all important patient information. | <input type="checkbox"/> |
| 12)                                                               |                          |                          |                          |                          |                          |

- |                                                                                                          |                          |                          |                          |                          |                          |
|----------------------------------------------------------------------------------------------------------|--------------------------|--------------------------|--------------------------|--------------------------|--------------------------|
| I know what information the receiving care provider needs.                                               | <input type="checkbox"/> |
| 13) During handoff, I ask the receiving provider if they have questions.                                 | <input type="checkbox"/> |
| 14) During handoff, I sometimes forget to mention something important.                                   | <input type="checkbox"/> |
| 15) I think that patient handoffs are important.                                                         | <input type="checkbox"/> |
| 16) I use the Epic critical care handoff tool.                                                           | <input type="checkbox"/> |
| 17) I need to access the medical record to get information that should have been transmitted in handoff. | <input type="checkbox"/> |
| 18) I have to find other clinicians to get information that should have been transmitted in handoff.     | <input type="checkbox"/> |
| 19) I don't know the person I am handing off to/from.                                                    | <input type="checkbox"/> |
| 20) I am happy with the current way handoffs are conducted.                                              | <input type="checkbox"/> |

21) Would any of the following make you consider changing how you perform your handoffs? Choose all that apply.

- ☐ Nothing - I am satisfied with my current practice  
☐ Evidence that a different process improves COMMUNICATION  
☐ Evidence that a different process improves PATIENT OUTCOMES  
☐ Data showing that UPHS patients are harmed by handoffs  
☐ Data showing that UPHS perioperative handoffs show poor communication  
☐ Other reason

22) You indicated "Other reason" for the question above. What other reasons would make you consider changing how you perform your handoffs?

---

23) Do you want to be entered into a lottery to win a \$50 Starbucks or Amazon gift card?

- ☐ Yes  
☐ No

24) Are you interested in being contacted about an interview or focus group? You will be paid for participation.

- ☐ Yes  
☐ No

25) Are you interested in being contacted about participating in a simulation of a handoff in the ICU? You will be paid for your participation.

- ☐ Yes  
☐ No

26) Please provide your email address.

---
